# Supplementary material
Source: HighWire-hosted journal article supplement (https://tsaco.smart01.highwire.org/content/5/1/e000552)

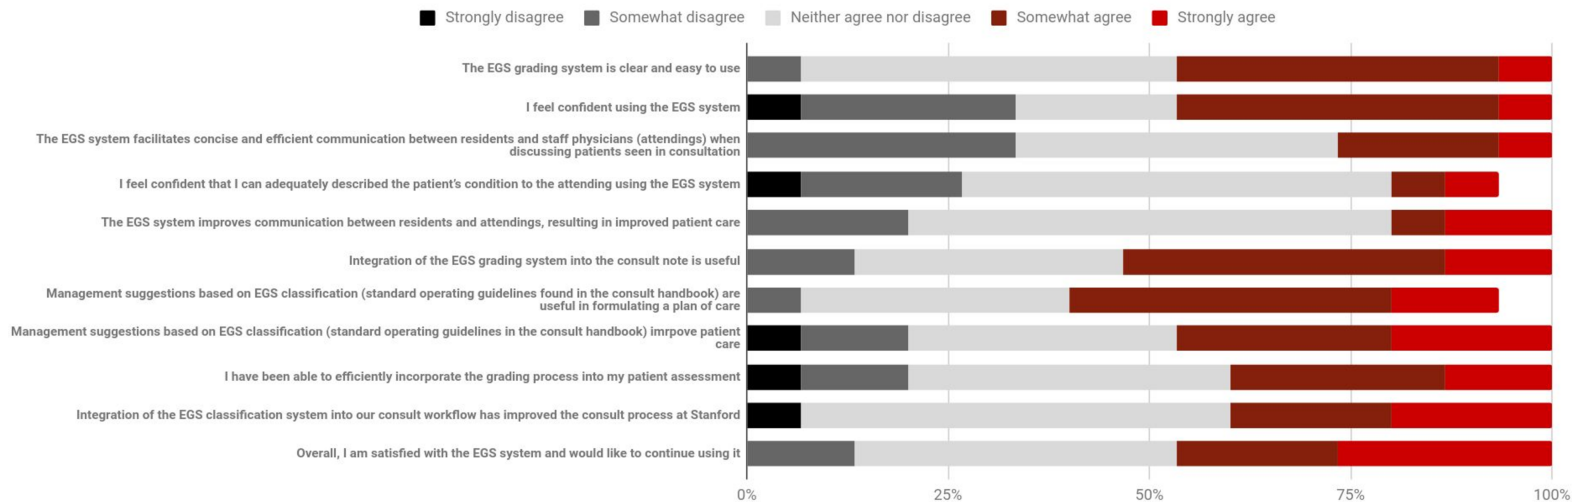

Supplemental Figure 2: Results from a survey sent to residents in August of 2018.

Supplement: inline-supplementary-material-2 [file inline-supplementary-material-2.pdf]
